# Supplementary material
Source: publisher figshare collection journal article supplement (https://gsajournals.figshare.com/ndownloader/files/12786008)
Supplement: Supplementary file 1 [file 12786008]

## Sheet: Sheet1
Table S2. List of marker-trait associations (MTAs) for Yield, Seed mass, Maturity, Height, or Lodging organized into chromosomal intervals (Wm82.a2.v1 assembly) that contained just one MTA of any trait, or multiple MTAs within 5 cM of each other (based on the Williams 82 x G. soja PI479752 (WxP) linkage map.
								Interval Postion on WxP Chr Map (cM)
		Interval numbers & begin-end positions that contain one or more MTAs								-log10(p)values for MTAs
Chr	Begin SNP marker name	No.	Start (bp)	End (bp)	Length (bp)	Begin SNP ssid	End SNP ssid	Chr	cM	Yield	Seed mass	Maturity	Height	Lodging
1	Gm0144639502AG	1	45501408			1235973842		1	56		7.01
1	BARC101Gm0150831484AG	2	51717031			715580158		1	83		4.13
2	Gm02180036CT	1	180034			1235974656		2	0	3.06
2	Gm026027712GT	2	6086859	6362970	276111	1235975071	1235975087	2	29-31		3.89	6.77	13.35
3	Gm03588585CT	1	587640	1396937	809297	1235975955	715584457	3	5-9			3.37	5.46
3	BARC101Gm032373742TC	2	2383419	2428982	45563	715584839	1235975369	3	17	3.44	6.3
3	BARC101Gm034929896CT	3	4739176			715586710		3	26					3.22
3	BARC101Gm0310014176CA	4	9499045			715584335		3	32	3.24
3	BARC101Gm0334741364AG	5	32698446			715585260		3	47				3.15
3	BARC101Gm0336438792GT	6	34416830			715585454		3	51					3.17
3	Gm0347293766GT	7	45292481	45526799	234318	1235975816	1235975825	3	112-113	7.76	4.58
4	BARC101Gm042705645CT	1	2763169			715587536		4	13		3.35
4	BARC101Gm045592124CT	2	5658722			715589084		4	30					4.31
4	BARC101Gm0729570952CT †	3	18476477	44593740	26117263	715597060	715588090	4	57-62		3.68	3.97	3.12	3.99
5	Gm054190784GA	1	5905686			1235977469		5	44		3.31
5	BARC101Gm0535207696AC	2	35478418			715591161		5	81					3.21
6	BARC101Gm0617230927CA	1	17276210	18055732	779522	715593713	1235978263	6	104-107		3.06		3.74
6	BARC101Gm0646675806GA	2	47222913			715594652		6	125			7.06
6	BARC101Gm0650641085CT	3	51316639			715595312		6	162	9.29
7	BARC101Gm074008483CT	1	4036328			715597942		7	26			9.9
7	BARC101Gm075213223GA	2	5251993	5125260	-126733	715598311	1235978710	7	33-34				7.13	8.06
7	Gm077832406TC	3	7871780			1235978889		7	45		14.43
7	BARC101Gm0715330002CA	4	15417090			715596397		7	64		4.49
7	BARC101Gm0737249021AG	5	37154618			715597548		7	92		5.35
7	BARC101Gm0740945201CT	6	40896029			715597998		7	110					3.66
7	BARC101Gm0742450573AG	7	42396323			715598109		7	119	3.34
8	BARC101Gm085295769AG	1	5304827	5968621	663794	715602578	715602620	8	33-36			5.85	3.01
8	BARC101Gm0846945161AG	2	47796376			715602531		8	178	3.18
9	BARC101Gm09104404TC	1	106196	106196	0	715602941	715602941	9	1	10.77		3.51
9	BARC101Gm091723633GA	2	1738859			715603155		9	12		3.37
9	BARC101Gm0932838454AG	3	35446094			715603632		9	64		7.69
9	BARC101Gm1335242360TC †	4	40958591	40959047	456	715615765	715615766	13	83				8.47	4.46
9	BARC101Gm0942526589TC	5	45722700			715604612		9	115			3.24
10	Gm1036744954CT	1	37272391			1235980540		10	61		3.72
10	BARC101Gm1044532915GA	2	45110885	45110885	0	715607455	715607455	10	112	40.77	13.04	232.43	77.62	34.02
10	BARC101Gm1046788615AG	3	47384837			715607686		10					11.84
11	BARC101Gm114938752TC	1	4948302	5634587	686285	715610801	715610878	11	26-28		4.76	4.42
11	BARC101Gm118095797GA	2	8106372			715611194		11	44	3.92
11	BARC101Gm1118663081AG	3	12556955			715609578		11	87			8.52
11	BARC101Gm1136469908TC	4	31994782			715610262		11	93		5.45
11	BARC101Gm1138648336AG	5	33885696			715610584		11	97	3.43
12	Gm122894203CA	1	2890595			1235981835		12	14		6.88
12	BARC101Gm124883456AC	2	4883898	4883898	0	715613121	715613121	12	28			3.07	3.78
12	BARC101Gm126648692AG	3	6679988			715613310		12	41				3.75
12	BARC101Gm128337984AG	4	8373158			715613568		12	50			4.09
12	BARC101Gm1240099279TC	5	40077424			715613054		12	107	4.21
13	BARC101Gm1310330320TG	1	11559403			715613721		13	2					3.39
13	BARC101Gm1323400902AG	2	24887920			715614141		13	53		7.38
13	BARC101Gm1336355529CT	3	37496830	37965132	468302	715615925	715616002	13	92-94	5.66		5.21
13	BARC101Gm1338116142GT	4	39293625	39311323	17698	715616083	715616085	13	100				67.78	26.32
14	BARC101Gm144770786CT	1	4856342			715619352		14	24					4.12
14	BARC101Gm145530899TC	2	5641328			715619689		14	30		3.08
14	BARC101Gm1446289371CT	3	45567917			715619121		14	78			3.11
14	BARC101Gm1447013062GA	4	46306480			715619224		14	84					3.78
15	Gm158476963TC	1	8517984			1235983913		15	42			4.85
15	BARC101Gm1512864272CT	2	12883590			715620493		15	64	3.1
15	BARC101Gm1540070656AG	3	40815708			715621828		15	83		13.07
16	BARC101Gm1634511TC	1	34320	41476	7156	715624722	715625071	16	0	15.04		3.24
16	BARC101Gm1631987848AC	2	32477366	32798239	320873	715624506	715624550	16	76-78	6.24	6.44
17	BARC101Gm173958581GA	1	3687958			715627604		17	20			3.85
17	BARC101Gm175608786TG	2	5341262			715628026		17	29		10.25
17	Gm177369313CT	3	7100289			1235984776		17	40	6.23
17	BARC101Gm178194356CT	4	7924918			715628226		17	45		26.25
18	BARC101Gm181690566AG	1	1691002	1735923	44921	715629280	715629312	18	12	4.17	8.84			9.8
18	BARC101Gm185971151CA	2	6008383			715632196		18	40		4.64
18	BARC101Gm1859603446CT	3	55331560	55622046	290486	715632176	715632223	18	95-98	6.19	5.29	13.51	42.7	10.23
19	Gm191587494TC	1	1630408	1631810	1402	1235985891	1235985893	19	12	5.12			15.71	61.37
19	BARC101Gm198503521TG	2	8476550			715636420		19	28	4.75
19	BARC101Gm1937916244TG	3	38126760			715634694		19	51	3.04
19	BARC101Gm1942246131AG	4	42447208	42454323	7115	715635205	1235986337	19	60		8.95			8.97
20	Gm202787901AG	1	2781194			1235986648		20	27	3.93
† SNP marker chr location in Wm82.a1.v1 assembly changed in the Wm.a2.v1 assembly.
